# Supplementary material for: Antioxidant and Anti-Inflammatory Effect of Cinnamon (Cinnamomum verum J. Presl) Bark Extract after In Vitro Digestion Simulation
Source: MDPI journal article supplement (doi:10.3390/foods12030452), 2023-01-18
Supplement: s1 [file s1]

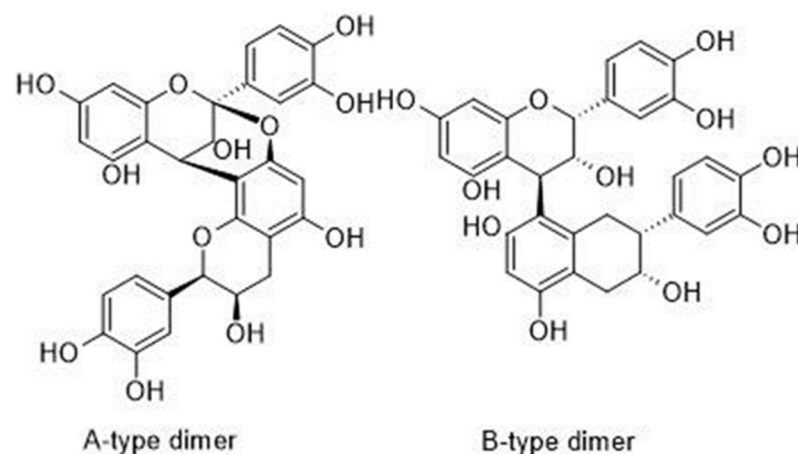

**Figure S1.** Procyanidins dimer A-type and B-type.

**Table S1.** Identification and quantification of metabolites in aqueous extract before and after digestion using mass spectrometry analysis by UHPLC-DAD-HESI-HRMS. In Table S1 are reported: peak number, probable identification, number of bonds for procyanidin species, retention time, chemical formula, theoretical and observed high-resolution m/z values, MS/MS fragments, and quantification (mg/ml). (\* quantified as trans cinnamic acid; \*\* quantified as catechin.).

| N° | Name        | Number of bonds | Rt (min) | Formula                                      | Mw [M-H]- Th | Mw [M-H]- Obs | Mw [M+H]+ Obs | MS/MS                      | (ug/10mgEXT) BEFORE DIGESTION $\lambda=280$ nm | (ug/10mgEXT) AFTER DIGESTION $\lambda=280$ nm | Quantification | Ref                                |
|----|-------------|-----------------|----------|----------------------------------------------|--------------|---------------|---------------|----------------------------|------------------------------------------------|-----------------------------------------------|----------------|------------------------------------|
| 1  | Gallic acid |                 | 6.46     | C <sub>7</sub> H <sub>6</sub> O <sub>5</sub> | 169.014      | 169.014       | -             | 125.024 - 169.014 - 69.035 | 361.48                                         | < LOQ                                         | *              | A. Vallverdu-Queralt et al. (2014) |

| Nº | Name                            | Number of bonds | Rt (min) | Formula                                        | Mw [M-H]- Th | Mw [M-H]- Obs | Mw [M+H]+ Obs | MS/MS                       | (ug/10mgEXT) BEFORE DIGESTION $\lambda=280$ nm | (ug/10mgEXT) AFTER DIGESTION $\lambda=280$ nm | Quantification | Ref                                |
|----|---------------------------------|-----------------|----------|------------------------------------------------|--------------|---------------|---------------|-----------------------------|------------------------------------------------|-----------------------------------------------|----------------|------------------------------------|
| 2  | Protocatechuic acid 4-glucoside |                 | 10.93    | C <sub>13</sub> H <sub>16</sub> O <sub>9</sub> | 315.072      | 315.072       | -             | 108.022 - 315.072 - 153.011 | 2720.82                                        | 150.70                                        | *              | A. Akhtar et al. (2021)            |
| 3  | 3,4-Dihydroxybenzaldehyde       |                 | 14.02    | C <sub>7</sub> H <sub>6</sub> O <sub>3</sub>   | 137.024      | 137.024       | -             | -                           | 2152.22                                        | 609.81                                        | *              | B. Klejdus et al. (2016)           |
| 4  | Catechin                        |                 | 17.94    | C <sub>15</sub> H <sub>14</sub> O <sub>6</sub> | 289.072      | 289.072       | 281.086       | 289.071 - 245.082 - 261.890 | 1656.12                                        | < LOQ                                         | **             | A. Vallverdú-Queralt et al. (2014) |
| 5  | 4-Hydroxybenzaldehyde           |                 | 18,37    | C <sub>7</sub> H <sub>6</sub> O <sub>2</sub>   | 121,028      | 121,028       | -             | -                           | 696.18                                         | 1071.2                                        | *              | A. Akhtar et al. (2021)            |
| 6  | 2-hydroxy-2-phenylacetic acid   |                 | 22.20    | C <sub>8</sub> H <sub>8</sub> O <sub>3</sub>   | 151.040      | 151.040       | 153.051       | -                           | 1615.18                                        | 664.1                                         | *              | A. Akhtar et al. (2021)            |

| Nº      | Name                               | Number of bonds | Rt (min)              | Formula                                         | Mw [M-H]- Th               | Mw [M-H]- Obs | Mw [M+H]+ Obs | MS/MS                       | (ug/10mgEXT) BEFORE DIGESTION $\lambda=280$ nm | (ug/10mgEXT) AFTER DIGESTION $\lambda=280$ nm | Quantification | Ref                                |
|---------|------------------------------------|-----------------|-----------------------|-------------------------------------------------|----------------------------|---------------|---------------|-----------------------------|------------------------------------------------|-----------------------------------------------|----------------|------------------------------------|
| 7       | Kaempferol o-C-di glucoside        |                 | 22.52                 | C <sub>27</sub> H <sub>30</sub> O <sub>16</sub> | 609.145                    | 609.146       | 611.155       | 609.146 - 489.103 - 369.061 | 27641.57                                       | 1591.5                                        | **             | A. Vallverdu-Queralt et al. (2014) |
| 8 a-b-c | Apigenin 6,8-di-C- glucoside       |                 | 24.49 + 30.92 + 33.08 | C <sub>27</sub> H <sub>30</sub> O <sub>15</sub> | 593.151                    | 593.151       | 595.167       | 593.151 - 353.066 - 383.077 | 37829.27                                       | 2258.43                                       | **             | A. Vallverdu-Queralt et al. (2014) |
| 9       | Coumaric acid                      |                 | 25.02                 | C <sub>9</sub> H <sub>8</sub> O <sub>3</sub>    | 163.040                    | 163.040       | -             | -                           | 1109.07                                        | 435.30                                        | *              | Standard                           |
| 10      | 5,6,7,3',4'-Pentahydroxyisoflavone |                 | 28.43                 | C <sub>15</sub> H <sub>12</sub> O <sub>7</sub>  | 303.050                    | 303.051       | -             | 125.024 - 285.040 - 226.420 | 3216.81                                        | < LOQ                                         | **             | A. Vallverdu-Queralt et al. (2014) |
| 11      | Coumarin                           |                 | 29.51                 | C <sub>9</sub> H <sub>6</sub> O <sub>2</sub>    | 147.044 [M+H] <sup>+</sup> | -             | 147.044       | 147.044 - 91.054 - 103.054  | 12739.64                                       | 7725.80                                       | **             | Standard                           |
| 12      | Apigenin 6-C-glucoside             |                 | 29.76                 | C <sub>21</sub> H <sub>20</sub> O <sub>10</sub> | 431.098                    | 431.098       | -             | 311.056 - 431.097 - 283.061 | 13846.88                                       | 842.4                                         | **             | A. Akhtar et al. (2021)            |

| Nº | Name                     | Number of bonds | Rt (min) | Formula                                         | Mw [M-H]- Th | Mw [M-H]- Obs | Mw [M+H]+ Obs | MS/MS                       | (ug/10mgEXT) BEFORE DIGESTION $\lambda=280$ nm | (ug/10mgEXT) AFTER DIGESTION $\lambda=280$ nm | Quantification | Ref                               |
|----|--------------------------|-----------------|----------|-------------------------------------------------|--------------|---------------|---------------|-----------------------------|------------------------------------------------|-----------------------------------------------|----------------|-----------------------------------|
| 13 | Rutin                    |                 | 31.23    | C <sub>27</sub> H <sub>30</sub> O <sub>16</sub> | 609.145      | 609.145       | 611.155       | 609.145 - 301.035 - 271.025 | 1555.94                                        | 411.7                                         | **             | A. Vallverdu-Queral et al. (2014) |
| 14 | Cinnamic acid derivate   |                 | 32.10    | C <sub>9</sub> H <sub>8</sub> O <sub>2</sub>    | 147.045      | 147.045       | 149.060       | 147.0450- 119.050 - 102.949 | 40453.96                                       | 3457.7                                        | *              |                                   |
| 15 | Quercetin-3-O-rhamnoside |                 | 34.98    | C <sub>21</sub> H <sub>20</sub> O <sub>11</sub> | 447.093      | 447.093       | 449.107       | 300.027 - 301.035- 271.024  | 5511.44                                        | 303.3                                         | **             | A. Vallverdu-Queral et al. (2014) |
| 16 | Trans-cinnamic acid      |                 | 37.35    | C <sub>9</sub> H <sub>8</sub> O <sub>2</sub>    | 147.045      | 147.045       | 149.060       | 147.045 - 119.050 - 102.949 | 40453.96                                       | 44463.7                                       | *              | B. Klejdus et al. (2016)          |
| 17 | 2-Hydroxybenzoic acid    |                 | 14.37    | C <sub>7</sub> H <sub>6</sub> O <sub>3</sub>    | 137.024      | 137.024       | -             | -                           | < LOQ                                          | 1174.2                                        | *              | A. Vallverdu-Queral et al. (2014) |
|    |                          |                 |          |                                                 |              |               |               | SUM (mg/Kg)                 | 194722.6                                       | 66750.1                                       |                |                                   |

| N°   | Name                                         | Number of bonds | Rt (min) | Formula                                         | Mw [M-H]- Th | Mw [M-H]- Obs | Mw [M+H]+ Obs                               | MS/MS                          | (ug/10mgEXT) BEFORE DIGESTION $\lambda=280$ nm | (ug/10mgEXT) AFTER DIGESTION $\lambda=280$ nm | Quantification | Ref                                                       |
|------|----------------------------------------------|-----------------|----------|-------------------------------------------------|--------------|---------------|---------------------------------------------|--------------------------------|------------------------------------------------|-----------------------------------------------|----------------|-----------------------------------------------------------|
| 18   | Procyanidin<br>s dimer<br>(Procyanidin B)    | 1               | 20.64    | C <sub>30</sub> H <sub>26</sub> O <sub>12</sub> | 577.134      | 577.135       | 579.149                                     | 289.071 - 407.077 -<br>125.024 | 20604.77                                       | < LOQ                                         | **             | S. A. Lazarus et al.<br>(1999) - N. Symma<br>et al.(2021) |
| 19 a | Procyanidin<br>s trimer<br>(Cinnamtannin B1) | 3               | 22.99    | C <sub>45</sub> H <sub>36</sub> O <sub>18</sub> | 863.182      | 863.182       | 865.197                                     | 411.071 - 289.071 -<br>711.135 | 279036.17                                      | < LOQ                                         | **             | S. A. Lazarus et al<br>(1999) - N. Symma<br>(2021)        |
| 19 b | Procyanidin<br>s trimer<br>(Cinnamtannin B1) | 3               | 26.93    | C <sub>45</sub> H <sub>36</sub> O <sub>18</sub> | 863.182      | 863.182       | 865.97                                      | 411.071 - 289.071 -<br>711.135 | 17038.38                                       | < LOQ                                         | **             | S. A. Lazarus et al<br>(1999) - N. Symma<br>(2021)        |
| 20 a | Procyanidin<br>s trimer                      | 2               | 20.32    | C <sub>45</sub> H <sub>38</sub> O <sub>18</sub> | 865.197      | 865.199       | 867.212 -<br>889.194<br>[M+Na] <sup>+</sup> | 125.024 - 407.077 -<br>289.071 | 8291.15                                        | < LOQ                                         | **             | S. A. Lazarus et al<br>(1999) - N. Symma<br>(2021)        |
| 20 b | Procyanidin<br>s trimer                      | 2               | 23.88    | C <sub>45</sub> H <sub>38</sub> O <sub>18</sub> | 865.197      | 865.199       | 867.212 -<br>889.194<br>[M+Na] <sup>+</sup> | 125.024 - 407.077 -<br>289.071 | 13648.11                                       | < LOQ                                         | **             | S. A. Lazarus et al<br>(1999) - N. Symma<br>(2021)        |

| N°   | Name                   | Number of bonds | Rt (min) | Formula                                         | Mw [M-H]- Th | Mw [M-H]- Obs            | Mw [M+H]+ Obs                         | MS/MS                                      | (ug/10mgEXT) BEFORE DIGESTION $\lambda=280$ nm | (ug/10mgEXT) AFTER DIGESTION $\lambda=280$ nm | Quantification | Ref                                          |
|------|------------------------|-----------------|----------|-------------------------------------------------|--------------|--------------------------|---------------------------------------|--------------------------------------------|------------------------------------------------|-----------------------------------------------|----------------|----------------------------------------------|
| 20 c | Procyanidin s trimer   | 2               | 25.34    | C <sub>45</sub> H <sub>38</sub> O <sub>18</sub> | 865.197      | 865.199                  | 867.212 - 889.194[M+ Na] <sup>+</sup> | 125.024 - 407.077 - 289.071                | 3325.95                                        | < LOQ                                         | **             | S. A. Lazarus et al (1999) - N. Symma (2021) |
| 21 a | Procyanidin s tetramer | 3               | 18.40    | C <sub>60</sub> H <sub>50</sub> O <sub>24</sub> | 1153.261     | 1153.262 - 576.128 (Z=2) | 1155.276                              | (MS/MS of Z =2) 125.024 -289.072 - 407.076 | 7151.75                                        | < LOQ                                         | **             | S. A. Lazarus et al (1999) - N. Symma (2021) |
| 21 b | Procyanidin s tetramer | 3               | 21.21    | C <sub>60</sub> H <sub>50</sub> O <sub>24</sub> | 1153.261     | 1153.262 - 576.128 (Z=2) | 1155.276                              | (MS/MS of Z =2) 125.024 -289.072 - 407.076 | 75398.08                                       | < LOQ                                         | **             | S. A. Lazarus et al (1999) - N. Symma (2021) |
| 21 c | Procyanidin s tetramer | 3               | 21.64    | C <sub>60</sub> H <sub>50</sub> O <sub>24</sub> | 1153.261     | 1153.262 - 576.128 (Z=2) | 1155.276                              | (MS/MS of Z =2) 125.024 -289.072 - 407.076 | 17971.63                                       | < LOQ                                         | **             | S. A. Lazarus et al (1999) - N. Symma (2021) |
| 21 d | Procyanidin s tetramer | 3               | 22.06    | C <sub>60</sub> H <sub>50</sub> O <sub>24</sub> | 1153.261     | 1153.262 - 576.128 (Z=2) | 1155.276                              | (MS/MS of Z =2) 125.024 -289.072 - 407.076 | 9688.92                                        | < LOQ                                         | **             | S. A. Lazarus et al (1999) - N. Symma (2021) |
| 21 e | Procyanidin s tetramer | 3               | 24.92    | C <sub>60</sub> H <sub>50</sub> O <sub>24</sub> | 1153.261     | 1153.262 - 576.128 (Z=2) | 1155.276                              | (MS/MS of Z =2) 125.024 -289.072 - 407.076 | 22295.69                                       | < LOQ                                         | **             | S. A. Lazarus et al (1999) - N. Symma (2021) |

| N°   | Name                  | Number of bonds | Rt (min) | Formula                                         | Mw [M-H]- Th | Mw [M-H]- Obs            | Mw [M+H]+ Obs | MS/MS                                      | (ug/10mgEXT) BEFORE DIGESTION $\lambda=280$ nm | (ug/10mgEXT) AFTER DIGESTION $\lambda=280$ nm | Quantification | Ref                                          |
|------|-----------------------|-----------------|----------|-------------------------------------------------|--------------|--------------------------|---------------|--------------------------------------------|------------------------------------------------|-----------------------------------------------|----------------|----------------------------------------------|
| 21 f | Procyanidins tetramer | 3               | 25.20    | C <sub>60</sub> H <sub>50</sub> O <sub>24</sub> | 1153.261     | 1153.262 - 576.128 (Z=2) | 1155.276      | (MS/MS of Z =2) 125.024 -289.072 - 407.076 | 5684.91                                        | < LOQ                                         | **             | S. A. Lazarus et al (1999) - N. Symma (2021) |
| 21 g | Procyanidins tetramer | 3               | 25.81    | C <sub>60</sub> H <sub>50</sub> O <sub>24</sub> | 1153.261     | 1153.262 - 576.128 (Z=2) | 1155.276      | (MS/MS of Z =2) 125.024 -289.072 - 407.076 | 11542.76                                       | < LOQ                                         | **             | S. A. Lazarus et al (1999) - N. Symma (2021) |
| 21 h | Procyanidins tetramer | 3               | 3.39     | C <sub>60</sub> H <sub>50</sub> O <sub>24</sub> | 1153.261     | 1153.262 - 576.128 (Z=2) | 1155.276      | (MS/MS of Z =2) 125.024 -289.072 - 407.076 | 11803.23                                       | < LOQ                                         | **             | S. A. Lazarus et al (1999) - N. Symma (2021) |
| 22 a | Procyanidins tetramer | 4               | 15.41    | C <sub>60</sub> H <sub>48</sub> O <sub>24</sub> | 1151.245     | 1151.245 - 575.119 (Z=2) | 1153.260      | 411.071 - 573.103 - 863.182                | 31059.79                                       | < LOQ                                         | **             | S. A. Lazarus et al (1999) - N. Symma (2021) |
| 22 b | Procyanidins tetramer | 4               | 16.00    | C <sub>60</sub> H <sub>48</sub> O <sub>24</sub> | 1151.245     | 1151.245 - 575.119 (Z=2) | 1153.260      | 411.071 - 573.103 - 863.182                | 104744.28                                      | < LOQ                                         | **             | S. A. Lazarus et al (1999) - N. Symma (2021) |
| 22 c | Procyanidins tetramer | 4               | 22.49    | C <sub>60</sub> H <sub>48</sub> O <sub>24</sub> | 1151.245     | 1151.245 - 575.119 (Z=2) | 1153.260      | 411.071 - 573.103 - 863.182                | 22389.54                                       | < LOQ                                         | **             | S. A. Lazarus et al (1999) - N. Symma (2021) |

| N°   | Name                   | Number of bonds | Rt (min) | Formula   | Mw [M-H]- Th           | Mw [M-H]- Obs            | Mw [M+H]+ Obs            | MS/MS                       | (ug/10mgEXT) BEFORE DIGESTION $\lambda=280$ nm | (ug/10mgEXT) AFTER DIGESTION $\lambda=280$ nm | Quantification | Ref                                          |
|------|------------------------|-----------------|----------|-----------|------------------------|--------------------------|--------------------------|-----------------------------|------------------------------------------------|-----------------------------------------------|----------------|----------------------------------------------|
| 22 d | Procyanidin s tetramer | 4               | 24.00    | C60H48O24 | 1151.245               | 1151.245 - 575.119 (Z=2) | 1153.260                 | 411.071 - 573.103 - 863.182 | 17031.53                                       | < LOQ                                         | **             | S. A. Lazarus et al (1999) - N. Symma (2021) |
| 23 a | Procyanidin s pentamer | 4               | 21.64    | C75H62O30 | 1441.324 (Z=2) 720.155 | (Z=2) 720.159            | -                        | 289.071 - 407.077 - 449.087 | 28714.54                                       | < LOQ                                         | **             | S. A. Lazarus et al (1999) - N. Symma (2021) |
| 23 b | Procyanidin s pentamer | 4               | 22,82    | C75H62O30 | 1441.324 (Z=2) 720.155 | (Z=2) 720.159            | -                        | 289.071 - 407.077 - 449.087 | 8321.21                                        | < LOQ                                         | **             | S. A. Lazarus et al (1999) - N. Symma (2021) |
| 23 c | Procyanidin s pentamer | 4               | 25,17    | C75H62O30 | 1441.324 (Z=2) 720.155 | (Z=2) 720.159            | -                        | 289.071 - 407.077 - 449.087 | 7385.32                                        | < LOQ                                         | **             | S. A. Lazarus et al (1999) - N. Symma (2021) |
| 23 d | Procyanidin s pentamer | 4               | 26.11    | C75H62O30 | 1441.324 (Z=2) 720.155 | (Z=2) 720.159            | -                        | 289.071 - 407.077 - 449.087 | 14748.50                                       | < LOQ                                         | **             | S. A. Lazarus et al (1999) - N. Symma (2021) |
| 23 a | Procyanidin s pentamer | 5               | 17.60    | C75H60O30 | 1439.310 (Z=2) 719.151 | (Z=2) 719.151            | 1441.323 - (Z=2) 721.165 | 289.072 - 411.071 - 451.103 | 4980.49                                        | < LOQ                                         | **             | S. A. Lazarus et al (1999) - N. Symma (2021) |



| N°   | Name                   | Number of bonds | Rt (min) | Formula   | Mw [M-H]- Th                 | Mw [M-H]- Obs    | Mw [M+H]+ Obs                  | MS/MS                          | (ug/10mgEXT) BEFORE DIGESTION $\lambda=280$ nm | (ug/10mgEXT) AFTER DIGESTION $\lambda=280$ nm | Quantification | Ref                                          |
|------|------------------------|-----------------|----------|-----------|------------------------------|------------------|--------------------------------|--------------------------------|------------------------------------------------|-----------------------------------------------|----------------|----------------------------------------------|
| 24 b | Procyanidin s pentamer | 5               | 18.58    | C75H60O30 | 1439.310<br>(Z=2)<br>719.151 | (Z=2)<br>719.151 | 1441.323 -<br>(Z=2)<br>721.165 | 289.072 - 411.071 -<br>451.103 | 25881.05                                       | < LOQ                                         | **             | S. A. Lazarus et al (1999) - N. Symma (2021) |
| 24 c | Procyanidin s pentamer | 5               | 19.44    | C75H60O30 | 1439.310<br>(Z=2)<br>719.151 | (Z=2)<br>719.151 | 1441.323 -<br>(Z=2)<br>721.165 | 289.072 - 411.071 -<br>451.103 | 38777.81                                       | < LOQ                                         | **             | S. A. Lazarus et al (1999) - N. Symma (2021) |
| 24 d | Procyanidin s pentamer | 5               | 20.26    | C75H60O30 | 1439.310<br>(Z=2)<br>719.151 | (Z=2)<br>719.151 | 1441.323 -<br>(Z=2)<br>721.165 | 289.072 - 411.071 -<br>451.103 | 15731.31                                       | < LOQ                                         | **             | S. A. Lazarus et al (1999) - N. Symma (2021) |
| 24 e | Procyanidin s pentamer | 5               | 23.56    | C75H60O30 | 1439.310<br>(Z=2)<br>719.151 | (Z=2)<br>719.151 | 1441.323 -<br>(Z=2)<br>721.165 | 289.072 - 411.071 -<br>451.103 | 19934.62                                       | < LOQ                                         | **             | S. A. Lazarus et al (1999) - N. Symma (2021) |
| 24 f | Procyanidin s pentamer | 5               | 27.38    | C75H60O30 | 1439.310<br>(Z=2)<br>719.151 | (Z=2)<br>719.151 | 1441.323 -<br>(Z=2)<br>721.165 | 289.072 - 411.071 -<br>451.103 | 5073.29                                        | < LOQ                                         | **             | S. A. Lazarus et al (1999) - N. Symma (2021) |
| 24 g | Procyanidin s pentamer | 5               | 28.02    | C75H60O30 | 1439.310<br>(Z=2)<br>719.151 | (Z=2)<br>719.151 | 1441.323 -<br>(Z=2)<br>721.165 | 289.072 - 411.071 -<br>451.103 | 7583.04                                        | < LOQ                                         | **             | S. A. Lazarus et al (1999) - N. Symma (2021) |

| N°   | Name                  | Number of bonds | Rt (min)   | Formula                                          | Mw [M-H]- Th                 | Mw [M-H]- Obs     | Mw [M+H]+ Obs     | MS/MS                          | (ug/10mgEXT) BEFORE DIGESTION $\lambda=280$ nm | (ug/10mgEXT) AFTER DIGESTION $\lambda=280$ nm | Quantification | Ref                                                |
|------|-----------------------|-----------------|------------|--------------------------------------------------|------------------------------|-------------------|-------------------|--------------------------------|------------------------------------------------|-----------------------------------------------|----------------|----------------------------------------------------|
| 25 a | Procyanidins hexamer  | 6               | 21.07      | C <sub>90</sub> H <sub>72</sub> O <sub>36</sub>  | 1727.373<br>(Z=2)<br>863.183 | (Z=2)<br>863.183  | 865.197           | 289.071 - 411.071 -<br>573.103 | 7593.59                                        | < LOQ                                         | **             | S. A. Lazarus et al<br>(1999) - N. Symma<br>(2021) |
| 25 b | Procyanidins hexamer  | 6               | 21.54      | C <sub>90</sub> H <sub>72</sub> O <sub>36</sub>  | 1727.373<br>(Z=2)<br>863.183 | (Z=2)<br>863.183  | 865.197           | 289.071 - 411.071 -<br>573.103 | 5886.32                                        | < LOQ                                         | **             | S. A. Lazarus et al<br>(1999) - N. Symma<br>(2021) |
| 25 c | Procyanidins hexamer  | 6               | 22.15      | C <sub>90</sub> H <sub>72</sub> O <sub>36</sub>  | 1727.373<br>(Z=2)<br>863.183 | (Z=2)<br>863.183  | 865.197           | 289.071 - 411.071 -<br>573.103 | 15041.65                                       | < LOQ                                         | **             | S. A. Lazarus et al<br>(1999) - N. Symma<br>(2021) |
| 25 d | Procyanidins hexamer  | 6               | 24.48      | C <sub>90</sub> H <sub>72</sub> O <sub>36</sub>  | 1727.373<br>(Z=2)<br>863.183 | (Z=2)<br>863.183  | 865.197           | 289.071 - 411.071 -<br>573.103 | 29339.87                                       | < LOQ                                         | **             | S. A. Lazarus et al<br>(1999) - N. Symma<br>(2021) |
| 26   | Procyanidins heptamer | 6               | broad peak | C <sub>105</sub> H <sub>86</sub> O <sub>42</sub> | (Z=2)<br>1008.724            | (Z=2)<br>1008.724 | (Z=2)<br>1010.738 | 289.071 - 411.071 -<br>573.103 | 133494.67                                      | < LOQ                                         | **             | S. A. Lazarus et al<br>(1999) - N. Symma<br>(2021) |
|      | Procyanidins heptamer | 7               |            | C <sub>105</sub> H <sub>84</sub> O <sub>42</sub> | (Z=2)<br>1007.716            | (Z=2)<br>1007.717 | (Z=2)<br>1009.730 | 289.071 - 411.071 -<br>573.103 |                                                |                                               |                | S. A. Lazarus et al<br>(1999) - N. Symma<br>(2021) |

| N° | Name                     | Number of bonds | Rt (min) | Formula    | Mw [M-H]- Th      | Mw [M-H]- Obs     | Mw [M+H]+ Obs     | MS/MS                           | (ug/10mgEXT) BEFORE DIGESTION λ=280 nm | (ug/10mgEXT) AFTER DIGESTION λ=280 nm | Quantification | Ref                                                |
|----|--------------------------|-----------------|----------|------------|-------------------|-------------------|-------------------|---------------------------------|----------------------------------------|---------------------------------------|----------------|----------------------------------------------------|
|    | Procyanidin<br>s octamer | 7               |          | C120H98O48 | (Z=2)<br>1152.756 | (Z=2)<br>1152.755 | -                 | 1152.249 - 412.075 -<br>574.108 |                                        |                                       |                | S. A. Lazarus et al<br>(1999) - N. Symma<br>(2021) |
|    | Procyanidin<br>s octamer | 8               |          | C120H96O48 | (Z=2)<br>1151.246 | (Z=2)<br>1151.246 | (Z=2)<br>1153.762 | 411.072 - 285.041 -<br>573.103  |                                        |                                       |                | S. A. Lazarus et al<br>(1999) - N. Symma<br>(2021) |
|    |                          |                 |          |            |                   |                   |                   | SUM (mg/Kg)                     | 1047193.9                              | < LOQ                                 |                |                                                    |

|               |           |         |
|---------------|-----------|---------|
| TOTAL (mg/Kg) | 1241916.5 | 66750.1 |
|---------------|-----------|---------|
